# Supplementary material for: New taxonomic insights for Brazilian Syrbatus Reitter (Coleoptera: Staphylinidae: Pselaphinae), including three new species and their mitochondrial genomes
Source: PeerJ. 2024 Aug 12;12:e17783. doi: 10.7717/peerj.17783 (PMC11326439; doi:10.7717/peerj.17783)
Supplement: Data S1 [file peerj-12-17783-s012.xlsx]

## Sheet: Plan1
	Syrbatus superciliata	Syrbatus superciliata	Syrbatus superciliata	Syrbatus moustache	Syrbatus moustache	Syrbatus moustache	Syrbatus obsidian	Syrbatus obsidian	Syrbatus obsidian	Syrbatus obsidian	Syrbatus obsidian	Syrbatus obsidian	Syrbatus obsidian	Syrbatus obsidian	Syrbatus obsidian	Syrbatus obsidian	Syrbatus obsidian
	ITV39053	ITV39054	ITV39055	ITV22154	ITV22156	ITV22158	ITV22170	ITV22172	ITV22171	ITV22173	ITV22161	ITV22162	ITV22163	ITV22164	ITV22165	ITV22167	ITV22159
	ISLA-110317	ISLA-110318	MPEG-01052549	ISLA-110319	ISLA-110320	MPEG-01052551	MPEG-01052553	ISLA-110321	MPEG-01052554	ISLA-110322	CEMT-00138995	MPEG-01052555	ISLA-110323	ISLA-110324	ISLA-110325	MPEG-01052556	CEMT-00138996
	Male	Female	Female	Male	Female	Female	Male	Male	Female	Female	Male	Male	Male	Male	Male	Female	Female
	Holotype	Paratype	Paratype	Holotype	Paratype	Paratype	Holotype	Paratype	Paratype	Paratype	Paratype	Paratype	Paratype	Paratype	Paratype	Paratype	Paratype
body length (BL)	1.520	1.506	1.595	2.116	2.132	2.168	1.987	1.537	1.970	1.981	1.743	1.770	1.691	1.705	1.598	2.113	1.862
body width (BW)	0.773	0.716	0.777	0.805	0.765	0.829	0.873	0.805	0.826	0.847	0.845	0.863	0.835	0.873	0.790	0.798	0.797
elytral length (EL)	0.750	0.657	0.692	0.704	0.745	0.766	0.790	0.776	0.732	0.773	0.756	0.796	0.769	0.807	0.739	0.713	0.741
elytral width (EW)	0.773	0.716	0.777	0.805	0.823	0.829	0.873	0.805	0.826	0.847	0.845	0.863	0.835	0.873	0.790	0.798	0.797
head length (HL)	0.471	0.438	0.404	0.583	0.462	0.463	0.440	0.483	0.441	0.471	0.48	0.495	0.473	0.497	0.488	0.446	0.459
head width (HW)	0.370	0.443	0.453	0.423	0.491	0.,464	0.592	0.575	0.523	0.526	0.601	0.614	0.583	0.617	0.575	0.536	0.506
neck width (NW)	0.210	0.249	0.247	0.231	0.268	0.231	0.230	0.252	0.268	0.273	0.279	0.256	0.267	0.272	0.277	0.260	0.253
pronotum length (PL)	0.469	0.454	0.475	0.456	0.479	0.492	0.487	0.480	0.468	0.773	0.500	0.472	0.473	0.495	0.483	0.713	0.475
pronotum width (PW)	0.428	0.426	0.430	0.449	0.461	0.479	0.482	0.457	0.493	0.847	0.498	0.504	0.495	0.507	0.480	0.798	0.482
scape length	0.148	0.155	0.148	0.131	0.136	0.104	0.189	0.163	0.145	0.114	0.169	0.171	0.161	0.176	0.142	0.260	0.139
scape width	0.087	0.061	0.081	0.114	0.084	0.085	0.135	0.125	0.089	0.090	0.143	0.142	0.120	0.104	0.106	0.098	0.095
pedicel length	0.072	0.082	0.074	0.064	0.089	0.088	0.105	0.089	0.098	0.081	0.097	0.100	0.086	0.096	0.102	0.110	0.103
pedicel width	0.054	0.054	0.055	0.058	0.061	0.058	0.065	0.057	0.067	0.068	0.067	0.067	0.063	0.065	0.069	0.067	0.064
antennomere 3, length	0.072	0.084	0.085	0.087	0.09	0.074	0.073	0.089	0.088	0.092	0.108	0.096	0.083	0.094	0.100	0.118	0.095
antennomere 3, width	0.049	0.049	0.045	0.055	0.054	0.053	0.062	0.057	0.058	0.060	0.061	0.064	0.058	0.060	0.066	0.060	0.055
antennomere 4, length	0.096	0.096	0.094	0.088	0.108	0.091	0.089	0.086	0.088	0.108	0.107	0.108	0.100	0.096	0.104	0.110	0.101
antennomere 4, width	0.044	0.047	0.046	0.050	0.055	0.055	0.058	0.058	0.054	0.056	0.055	0.059	0.057	0.056	0.057	0.060	0.060
antennomere 5, length	0.071	0.105	0.105	0.090	0.099	0.099	0.107	0.112	0.108	0.115	0.125	0.117	0.098	0.109	0.118	0.120	0.110
antennomere 5, width	0.051	0.048	0.042	0.053	0.053	0.049	0.062	0.055	0.058	0.055	0.059	0.063	0.060	0.062	0.074	0.064	0.060
antennomere 6, length	0.052	0.094	0.094	0.079	0.091	0.087	0.096	0.102	0.100	0.098	0.104	0.096	0.092	0.094	0.096	0.103	0.096
antennomere 6, width	0.048	0.045	0.040	0.048	0.051	0.048	0.058	0.056	0.057	0.056	0.052	0.057	0.056	0.059	0.055	0.063	0.057
antennomere 7, length	0.063	0.085	0.104	0.079	0.087	0.082	0.063	0.101	0.092	0.09	0.107	0.105	0.092	0.098	0.102	0.108	0.092
antennomere 7, width	0.051	0.048	0.050	0.053	0.054	0.052	0.059	0.054	0.057	0.056	0.056	0.061	0.057	0.060	0.058	0.064	0.062
antennomere 8, length	0.046	0.065	0.077	0.055	0.069	0.058	0.065	0.078	0.070	0.077	0.079	0.087	0.075	0.074	0.068	0.081	0.076
antennomere 8, width	0.056	0.052	0.049	0.051	0.053	0.055	0.060	0.055	0.057	0.055	0.057	0.059	0.056	0.056	0.056	0.062	0.056
antennomere 9, length	0.085	0.095	0.108	0.086	0.092	0.089	0.095	0.111	0.097	0.098	0.109	0.111	0.109	0.102	0.093	0.118	0.106
antennomere 9, width	0.062	0.070	0.071	0.072	0.075	0.068	0.075	0.071	0.072	0.073	0.072	0.074	0.074	0.071	0.070	0.077	0.068
antennomere 10, length	0.104	0.096	0.113	0.072	0.097	0.096	0.085	0.106	0.100	0.103	0.112	0.117	0.106	0.103	0.086	0.106	0.099
antennomere 10, width	0.071	0.076	0.083	0.079	0.084	0.078	0.083	0.079	0.082	0.081	0.082	0.086	0.080	0.078	0.075	0.085	0.083
antennomere 11, length	0.236	0.228	0.246	0.222	0.229	0.212	0.223	0.242	0.238	0.238	0.234	0.257	0.246	0.220	0.236	0.261	0.219
antennomere 11, width	0.101	0.102	0.098	0.098	0.103	0.106	0.104	0.101	0.104	0.105	0.105	0.110	0.109	0.098	0.095	0.116	0.103
